# Supplementary material
Source: MDPI journal article supplement (https://www.mdpi.com/search?q=metabolites-03-00101)
Supplement: s001 [file supplementary.xlsx]

## Sheet: supplementary
Metabolite					Analyte		Normalized Response [IS-1 OD750-1 ml-1 (sample volume)]									Normalized Response [IS-1 OD750-1 ml-1 (sample volume)]									X-folds
Name	Sum Formula	KEGG-ID	CAS-ID		MPIMP-ID		Average									Standard Deviation									to wt Oh (N-deficiency)
Copy values of any row below into row 8.
All metabolites are quantified using two or more mass fragments.							wt				sll0783														wt					sll0783
							0 h	6 h	24 h	168 h	0 h	6 h	24 h	168 h											0 h	6 h	24 h	168 h		0 h	6 h	24 h	168 h
Glutaric acid, 2-oxo-	C5H6O5	C00026	328-50-7		A158004-101		0.00781559	0.00718506	0.0139635	0.0182457	0.00233522	0.00329465	0.00613705	0.0176995		0.000974458	0.0026706	0.00758135	0.00337744	0.00282545	0.00028897	0.00370973	0.0113285		1	0.919324	1.78663	2.33453		0.29879	0.421548	0.785231	2.26464			0
							wt 0h	wt 6h	wt 24h	wt 168h	sll0783 0h	sll0783 6h	sll0783 24h	sll0783 168h		wt 0h	wt 6h	wt 24h	wt 168h	sll0783 0h	sll0783 6h	sll0783 24h	sll0783 168h		wt 0h	wt 6h	wt 24h	wt 168h		sll0783 0h	sll0783 6h	sll0783 24h	sll0783 168h			blank
							AV	AV	AV	AV	AV	AV	AV	AV		SD	SD	SD	SD	SD	SD	SD	SD		X-fold	X-fold	X-fold	X-fold		X-fold	X-fold	X-fold	X-fold			X-fold
Acids
Citric acid	C6H8O7	C00158	77-92-9		A182004-101		0.00786421	0.0185502	0.0206387	0.0617852	0.0112971	0.00832844	0.0128556	0.0139392		0.00185434	0.00734596	0.0126082	0.00200769	0.00324867	0.00143541	0.00261884	0.00925742		1	2.35881	2.62438	7.8565		1.43652	1.05903	1.6347	1.77249			0.0567958
Fumaric acid	C4H4O4	C00122	110-17-8		A137001-101		0.00017282	0.000451186	0.001619	0.000589487	0.000226072	0.000207896	0.000822248	0.00136341		2.1379e-05	0.000208386	0.000800439	0.000117336	3.6791e-06	3.75476e-05	0.000336315	0.000914265		1	2.61073	9.36817	3.41099		1.30814	1.20297	4.75784	7.8892			0.138545
Malic acid	C4H6O5	C00149	97-67-6		A149001-101		0.000439822	0.00127747	0.00253954	0.00216781	0.000659256	0.000608253	0.00306824	0.00617278		0.000170061	0.000191767	1.70829e-05	0.000818699	0.000371682	3.36912e-05	0.000711228	0.00439374		1	2.90451	5.77402	4.92884		1.49892	1.38295	6.97608	14.0347			0
Glutaric acid, 2-oxo-	C5H6O5	C00026	328-50-7		A158004-101		0.00781559	0.00718506	0.0139635	0.0182457	0.00233522	0.00329465	0.00613705	0.0176995		0.000974458	0.0026706	0.00758135	0.00337744	0.00282545	0.00028897	0.00370973	0.0113285		1	0.919324	1.78663	2.33453		0.29879	0.421548	0.785231	2.26464			0
Succinic acid	C4H6O4	C00042	110-15-6		A134001-101		0.000853847	0.000813029	0.000692866	0.00120811	0.00048702	0.000383946	0.000983756	0.00117929		5.37304e-05	0.000331212	0.000979861	8.90322e-05	9.94693e-05	4.10418e-05	0.000368763	0.000839616		1	0.952195	0.811464	1.4149		0.570383	0.449666	1.15215	1.38115			0.0304753
Oxalic acid	C2H2O4	C00209	144-62-7		A113002-101		0.00252161	0.00197422	0.0011493	0.00173386	0.00244137	0.00154444	0.00171467	0.00115613		0.000539895	0.000603809	0.00132786	3.84439e-05	0.00137178	0.000303675	0.000545309	0.000958718		1	0.782924	0.455781	0.687602		0.968182	0.612483	0.679991	0.45849			1.97599
Glycolic acid	C2H4O3	C00160	79-14-1		A106002-101		0.000538409	0.000321409	0.000218949	0.000282029	0.000446204	0.00028067	0.000415351	0.000169385		3.29333e-05	4.22817e-05	0.000273866	1.87474e-05	0.000124504	8.04956e-05	0.000110567	0.000197323		1	0.596961	0.40666	0.52382		0.828746	0.521296	0.771441	0.314603			0.878887
Amino Acids																									#DIV/0!	#DIV/0!	#DIV/0!	#DIV/0!		#DIV/0!	#DIV/0!	#DIV/0!	#DIV/0!
Aspartic acid	C4H7NO4	C00049	56-84-8		A144003-101		0.000405536	0.00152954	0.0014302	7.92861e-05	0.00120192	0.000766702	0.0013909	0.000469813		2.22745e-05	0.000575987	7.0808e-06	3.51823e-05	0.00051426	5.17439e-05	0.00100175	0.000523075		1	3.77165	3.52669	0.195509		2.96378	1.89059	3.42977	1.1585			0.18663
Glutamate	C5H9NO4	C00025	56-86-0		A154002-101		0.0253337	0.0161507	0.00292551	0.00141517	0.0170621	0.0174944	0.0133242	0.0077887		0.00719241	0.000979667	0.00185472	0.000811731	0.00270236	0.00732943	0.00561316	0.00168989		1	0.637519	0.115479	0.0558613		0.673494	0.690558	0.525949	0.307444			0.000974902
Glycine	C2H5NO2	C00037	56-40-6		A133001-101		0.000900516	0.00762073	0.000518669	0.000425165	0.0016178	0.00185192	0.00120499	0.000413379		0.000152952	0.00069234	0.000648966	3.10175e-05	0.00119977	0.000149581	0.000207313	0.000321143		1	8.46262	0.575969	0.472135		1.79652	2.05651	1.33812	0.459047			0.655165
Isoleucine	C6H13NO2	C00407	73-32-5		A132002-101		3.35367e-05	0.000263072	2.87517e-05	2.24914e-05	0.00012913	3.21964e-05	8.98987e-05	0.000135133		1.35327e-05	9.54218e-05	1.6192e-05	3.18077e-05	0.000150716	2.72243e-06	1.3433e-05	2.13806e-05		1	7.84431	0.857319	0.670651		3.85042	0.960036	2.68061	4.02941			0
Lysine	C6H14N2O2	C00047	56-87-1		A192003-101		0.000256818	0.00108539	0.000503548	1.85323e-05	0.00309242	0.000258646	0.00156432	0.00323753		5.41682e-05	4.15849e-05	0.000712125	2.62087e-05	0.00437334	4.57139e-05	0.00190044	0.00386616		1	4.2263	1.96072	0.0721614		2.26	1.00712	1.26	0.78			0.332826
Phenylalanine	C9H11NO2	C00079	63-91-2		A164001-101		0.00035127	0.00134802	0.000413133	1.4339e-05	0.000530483	0.00044163	0.000595673	0.00027052		6.22608e-05	0.000630695	0.000318808	2.02785e-05	0.000385261	4.0739e-05	0.000271873	0.000186902		1	3.83756	1.17611	0.0408205		1.51018	1.25724	1.69577	0.77012			0
Glutamine	C5H7NO3	C02238			A153002-101		0.0149977	0.00978202	0.0182463	0.00338581	0.00774697	0.00376408	0.00509327	0.0261334	0	-8.09267e-06	-0.00058911	0.000393316	5.9302e-06	0.00398808	4.97495e-06	0.00162857	0.00367926		1	0.652233	1.21661	0.225755		0.516543	0.250977	0.339602	1.74249			0.026225	0.000395406
Serine	C3H7NO3	C00065	56-45-1		A128001-101		0.00110694	0.00743263	0.000524979	0.000420048	0.00147513	0.00139476	0.00189599	0.000227384		0.000221845	0.00284329	0.000716889	1.56925e-05	0.000422447	0.000369256	0.000659403	0.000217938		1	6.71457	0.474262	0.379468		1.33262	1.26002	1.71282	0.205416			0.0655411
Threonine	C4H9NO3	C00188	72-19-5		A140001-101		8.27709e-05	0.0005283	0.000156873	6.86831e-05	0.000164207	9.26463e-05	0.000173267	0.000332545		1.84443e-05	0.000384065	0.000139219	1.67217e-06	0.000143999	1.09445e-05	6.31105e-06	0.000167399		1	6.38267	1.89527	0.829797		1.98387	1.11931	2.09334	4.01766			0
Valine	C5H11NO2	C00183	72-18-4		A122001-101		1.85126e-05	0.000120187	0	2.66543e-05	7.26666e-05	5.25051e-05	2.76422e-05	0		4.5858e-06	1.00895e-05	0	8.7354e-06	7.33023e-05	5.3281e-06	1.07179e-05	0		1	6.49216	1	1.43979		3.92525	2.83618	1.49316	1			6.37647
N- Compounds																									#DIV/0!	#DIV/0!	#DIV/0!	#DIV/0!		#DIV/0!	#DIV/0!	#DIV/0!	#DIV/0!
Adenosine	C10H13N5O4	C00212	58-61-7		A265001-101		0.00232157	0.00240041	0.00669627	0.00194712	0.000925252	0.00130739	0.00378696	0.00666305		0.000342567	0.0011889	0.00395826	0.000972436	0.00117688	0.0002027	0.00158684	0.00419163		1	1.03396	2.88437	0.838708		0.398545	0.563148	1.6312	2.87006			0
Ethanolamine	C2H7NO	C00189			A128002-101		0.0259156	0.0424834	0.0316289	0.0342922	0.0312037	0.0371219	0.0457854	0.0351337		0.00259731	0.0023405	0.000567301	0.00579163	0.00354493	4.38522e-05	0.00388015	0.00219269		1	1.6393	1.22046	1.32323		1.20405	1.43242	1.76671	1.3557			9.46391
Uracil	C4H4N2O2	C00106	66-22-8		A136001-101		8.95978e-05	5.81336e-05	2.90001e-05	5.94115e-05	7.57676e-05	2.30806e-05	1.71525e-05	0.000109079		3.02292e-05	2.2898e-05	4.10124e-05	5.6814e-05	1.6804e-05	3.26409e-05	2.42573e-05	3.28281e-05		1	0.648828	0.32367	0.663091		0.845642	0.257602	0.191439	1.21743			0
Phenolic Compounds																									#DIV/0!	#DIV/0!	#DIV/0!	#DIV/0!		#DIV/0!	#DIV/0!	#DIV/0!	#DIV/0!
Benzoic acid**	C7H6O2	C00180	65-85-0		A128003-101		0.00161555	0.00273421	0.00147747	0.0017158	0.00204601	0.00222527	0.00534155	0.000940866		2.86061e-05	0.00120407	0.00202261	0.000241287	0.000616714	1.26162e-05	0.00467831	0.00128286		1	1.69243	0.914529	1.06205		1.26644	1.37741	3.30633	0.582379			9.59628
Phosphates																									#DIV/0!	#DIV/0!	#DIV/0!	#DIV/0!		#DIV/0!	#DIV/0!	#DIV/0!	#DIV/0!
Adenosine-5'-monophosphat	C10H14N5O7P	C00020	61-19-8		A307003-101		0	0	1.95026e-05	0	0	0	1.41338e-05	2.09948e-05		0	0	2.75808e-05	0	0	0	1.99882e-05	2.96912e-05
Fructose	C6H12O6	C00095	57-48-7		A187002-101		0.000326282	0.00247033	0.00295962	0.00137154	0.00126048	0.00205909	0.0019525	0.00370819		8.39809e-05	0.00101535	0.00156134	7.95319e-05	0.000608284	0.000322231	0.00161878	0.0024885		1	7.57116	9.07074	4.20353		3.86315	6.31077	5.98408	11.365			12.3256
Glucose	C6H12O6	C00031	50-99-7		A189002-101		0.000224232	0.00228927	0.00326747	0.000551539	0.00166922	0.00071603	0.00289409	0.00585923		1.77576e-05	0.000520443	0.00342462	0.000153242	0.000545221	7.84063e-05	0.00293632	0.00674291		1	10.2094	14.5718	2.45967		7.44417	3.19325	12.9067	26.1302			25.2966
Fructose-6-P	C6H13O9P	C00085	643-13-0		A232002-101		4.09511e-05	0.00315689	0.00408688	0.000938818	0.000468662	0.00130213	0.00579817	0.00601546		5.79136e-05	0.000914597	0.00227022	0.000742155	0.000367881	0.000636822	0.00388952	0.00595622		1	77.0892	99.7991	22.9253		11.4444	31.7971	141.588	146.894			0
Glucose-6-P	C6H13O9P	C00092	56-73-5		A235002-101		0.00392166	0.00944665	0.0104842	0.00222499	0.000758427	0.00288513	0.0133596	0.0134583		0	0.00338933	0.00585609	0.00182511	0.000962891	0.000997176	0.00868345	0.012571		1	2.40884	2.6734	0.567358		0.193394	0.73569	3.40661	3.43179			0
3-P-glycerate	C3H7O7P	C00197	820-11-1		A181003-101		0.00334118	0.00827389	0.0321032	0.00325708	0.00127948	0.00168955	0.00204716	0.00432419		0.000908692	0.00332976	0.0204074	0.00135468	0.00040539	0.000370714	0.00127674	0.00217374		1	2.47634	9.60835	0.974829		0.382943	0.505675	0.612706	1.29421			0.0193544
PEP	C3H5O6P	C00074	138-08-9		A159005-101		0.000197303	0.000251703	0.000462621	0.000124643	3.71956e-05	8.41425e-05	2.98521e-05	6.91015e-05		1.7064e-05	0.000116287	0.000214651	4.92351e-05	2.25776e-06	1.7201e-05	5.69364e-06	3.46095e-05		1	1.27572	2.34473	0.631734		0.18852	0.426464	0.151301	0.350231			0
Sorbitol	C6H14O6	C00794	50-70-4		A193001-101		0.00131637	0.0433516	0.00573749	0.00550375	0.00337977	0.0048115	0.00127412	0.000905017		0.00137497	0.0577574	0.000681274	0.00771397	0.00367175	0.00654829	0.00109598	0.000646274		1	32.9328	14.56	11.13		2.5675	3.65514	0.967906	0.687512			0.111482
Polyhydroxy Acids																									#DIV/0!	#DIV/0!	#DIV/0!	#DIV/0!		#DIV/0!	#DIV/0!	#DIV/0!	#DIV/0!
Galactonic acid	C6H12O7	C00880	576-36-3		A199002-101		0.000112204	0.000243829	0.00031671	5.97785e-05	0.000183703	0.000185406	0.000578126	0.000301186		2.95982e-05	0.000101391	0.000181481	2.62438e-05	0.000120121	3.9839e-05	0.000202158	0.000190732		1	2.17309	2.82263	0.532767		1.63723	1.6524	5.15247	2.68428			2.98817
Gluconic acid	C6H12O7	C00257	526-95-4		A200001-101		8.55497e-06	2.59843e-05	0.000240127	1.73372e-05	2.97199e-05	0	8.7866e-05	0.000229248		1.20986e-05	8.12292e-06	0.000151248	2.45185e-05	4.70281e-06	0	8.24392e-05	0.000180927		1	3.03734	28.0687	2.02656		3.47399	1	10.2708	26.7971			0
Glyceric acid	C3H6O4	C00258	473-81-4		A135003-101		0.0066724	0.00403228	0.00803037	0.0024561	0.00396392	0.00138187	0.00439483	0.00501936		0.000567775	0.0019456	0.00415561	0.00047646	0.000660225	0.000256702	0.000295322	0.00359657		1	0.604323	1.20352	0.368099		0.594076	0.207103	0.658657	0.752256			0.0785233
Threonic acid	C4H8O5	C01620	7306-96-9		A156001-101		0.0397849	0.0383389	0.0485284	0.0179612	0.0529717	0.0266262	0.0529514	0.0388646		0.00481715	0.00188233	0.0247085	0.00109639	0.0160976	0.00598859	0.0191463	0.0244899		1	0.963653	1.21977	0.451458		1.33145	0.669252	1.33094	0.976867			0.524736
Polyols																									#DIV/0!	#DIV/0!	#DIV/0!	#DIV/0!		#DIV/0!	#DIV/0!	#DIV/0!	#DIV/0!
Inositol, myo-	C6H12O6	C00137	87-89-8		A209002-101		0.00286417	0.00438576	0.0107885	0	0.00183308	0.00274841	0.00521905	0		0.00126515	0.00217882	0.00564242	0	0.00250341	0.000154044	0.00236079	0		1	1.53125	3.76669	1		0.640002	0.959583	1.82218	1			0
Monosaccharides																									#DIV/0!	#DIV/0!	#DIV/0!	#DIV/0!		#DIV/0!	#DIV/0!	#DIV/0!	#DIV/0!
Disaccharides																									#DIV/0!	#DIV/0!	#DIV/0!	#DIV/0!		#DIV/0!	#DIV/0!	#DIV/0!	#DIV/0!
Sucrose	C12H22O11	C00089	57-50-1		A264001-101		0.00101828	0.0328756	0.00621369	0.0267141	0.00128021	0.00108145	0.0108506	0.0862753		0.000139867	0.0424391	0.00388374	0.0133238	0.00121905	1.11253e-05	0.00321548	0.0411143		1	32.2855	6.10215	26.2346		1.25723	1.06204	10.6558	84.7267			0.329302
Trehalose, alpha,alpha'-	C12H22O11	C01083	99-20-7		A274002-101		3.5635e-05	8.52016e-05	0.000113865	5.48649e-05	9.18932e-05	3.51613e-05	8.11856e-05	0.000101407		2.87976e-05	3.98994e-05	0.000137839	2.72046e-05	8.36543e-05	2.55503e-05	4.10544e-05	0.000115679		1	2.39096	3.19532	1.53964		2.57874	0.986708	2.27826	2.84571			2.6081
Trisaccharides																									#DIV/0!	#DIV/0!	#DIV/0!	#DIV/0!		#DIV/0!	#DIV/0!	#DIV/0!	#DIV/0!
Kestose, 1-	C18H32O16	C03661			A340003-101		0	0	0	0	0	0	0	0		0	0	0	0	0	0	0	0
Raffinose	C18H32O16	C00492	512-69-6		A337002-101		0	0	0	0	0	0	0	0		0	0	0	0	0	0	0	0
Inositol-1-phosphate, myo-	C6H13O9P	C01177			A243001-101		4.12702e-05	5.90622e-05	0	9.46667e-06	1.59584e-05	1.07134e-05	6.88882e-05	9.69414e-05		1.66753e-06	1.51857e-05	0	1.33879e-05	2.25686e-05	1.5151e-05	2.87149e-05	7.9784e-05		1	1.43111	1	0.229383		0.386681	0.259591	1.6692	2.34894			0
Pyroglutamic acid	C5H7NO3	C02238			A153002-101		0.0403314	0.0259327	0.0211718	0.00480098	0.0248091	0.0137303	0.0184175	0.0339221		0.00545391	0.0219139	0.0200023	0.00133616	0.00631391	0.0029927	0.0114956	0.0295196		1	0.642991	0.524946	0.119038		0.61513	0.340437	0.456654	0.841083			0.029886
Glutamic acid	C5H9NO4	C00025	56-86-0		A154002-101		0.0253337	0.0161507	0.00292551	0.00141517	0.0170621	0.0174944	0.0133242	0.0077887		0.00719241	0.000979667	0.00185472	0.000811731	0.00270236	0.00732943	0.00561316	0.00168989		1	0.637519	0.115479	0.0558613		0.673494	0.690558	0.525949	0.307444			0.000974902
Glutamine	C5H7NO3	C02238			A153002-101		0.0149977	0.00978202	0.0182463	0.00338581	0.00774697	-0.00376408	0.00509327	0.0261334	0	-0.0017385	0.0209342	0.0181475	0.000524426	0.00361155	-0.00433673	0.00588243	0.0278298		1	0.652233	1.21661	0.225755		0.516543	0.250977	0.339602	1.74249			1.21002	0.034967
Glutaric acid, 2-oxo-	C5H6O5	C00026	328-50-7		A158004-101		0.00781559	0.00718506	0.0139635	0.0182457	0.00233522	0.00329465	0.00613705	0.0176995		0.000974458	0.0026706	0.00758135	0.00337744	0.00282545	0.00028897	0.00370973	0.0113285		1	0.919324	1.78663	2.33453		0.29879	0.421548	0.785231	2.26464			0
							wt 0h	wt 6h	wt 24h	wt 168h	sll0783 0h	sll0783 6h	sll0783 24h	sll0783 168h		wt 0h	wt 6h	wt 24h	wt 168h	sll0783 0h	sll0783 6h	sll0783 24h	sll0783 168h		wt 0h	wt 6h	wt 24h	wt 168h		sll0783 0h	sll0783 6h	sll0783 24h	sll0783 168h			blank
							AV	AV	AV	AV	AV	AV	AV	AV		SD	SD	SD	SD	SD	SD	SD	SD		X-fold	X-fold	X-fold	X-fold		X-fold	X-fold	X-fold	X-fold			X-fold
